# Supplementary material
Source: MDPI journal article supplement (https://www.mdpi.com/2218-2004/9/4/76)
Supplement: s1 [file s1]

## Supplementary data

**Table S1.** Cross sections ( $10^{-20} \text{ m}^2$ ) for  $\text{Xe}^{7+}$  for the transitions from  $4d^{10}5s \text{ }^2\text{S}_{1/2}$  state at incident electron energies 200, 300, 400, 500, 700, 1000, 1200, 1500, 2000, 2500, 3000 eV.

| Index | $J_b$ | 200      | 300      | 400      | 500      | 700      | 1000     | 1200     | 1500     | 2000     | 2500     | 3000     |
|-------|-------|----------|----------|----------|----------|----------|----------|----------|----------|----------|----------|----------|
| 10    | 3/2   | 1.370E-1 | 1.234E-1 | 1.113E-1 | 1.014E-1 | 8.654E-2 | 7.149E-2 | 6.438E-2 | 5.640E-2 | 4.731E-2 | 4.097E-2 | 3.625E-2 |
| 9     | 1/2   | 6.568E-2 | 5.913E-2 | 5.334E-2 | 4.860E-2 | 4.147E-2 | 3.426E-2 | 3.085E-2 | 2.703E-2 | 2.267E-2 | 1.964E-2 | 1.738E-2 |
| 8     | 1/2   | 3.144E-3 | 2.710E-3 | 2.421E-3 | 2.195E-3 | 1.859E-3 | 1.531E-3 | 1.375E-3 | 1.197E-3 | 9.973E-4 | 8.612E-4 | 7.611E-4 |
| 7     | 3/2   | 1.106E-2 | 9.551E-3 | 8.534E-3 | 7.731E-3 | 6.541E-3 | 5.382E-3 | 4.828E-3 | 4.200E-3 | 3.497E-3 | 3.033E-3 | 2.698E-3 |
| 6     | 1/2   | 8.446E-4 | 7.167E-4 | 6.361E-4 | 5.736E-4 | 4.837E-4 | 3.969E-4 | 3.557E-4 | 3.092E-4 | 2.575E-4 | 2.223E-4 | 1.964E-4 |
| 5     | 1/2   | 1.058E-2 | 9.043E-3 | 8.017E-3 | 7.224E-3 | 6.073E-3 | 4.967E-3 | 4.445E-3 | 3.857E-3 | 3.203E-3 | 2.760E-3 | 2.436E-3 |
| 4     | 3/2   | 3.749E-3 | 3.152E-3 | 2.775E-3 | 2.491E-3 | 2.085E-3 | 1.700E-3 | 1.519E-3 | 1.317E-3 | 1.092E-3 | 9.390E-4 | 8.266E-4 |
| 3     | 3/2   | 3.416E-4 | 2.435E-4 | 2.031E-4 | 1.774E-4 | 1.450E-4 | 1.166E-4 | 1.039E-4 | 8.982E-5 | 7.444E-5 | 6.412E-5 | 5.661E-5 |
| 2     | 3/2   | 9.394E-4 | 7.521E-4 | 6.526E-4 | 5.808E-4 | 4.832E-4 | 3.929E-4 | 3.510E-4 | 3.043E-4 | 2.529E-4 | 2.163E-4 | 1.888E-4 |

**Table S2.** Cross sections ( $10^{-20} \text{ m}^2$ ) for  $\text{Xe}^{8+}$  for the transitions from  $4d^{10} \text{ }^1\text{S}_0$  state at incident electron energies 200, 300, 400, 500, 700, 1000, 1200, 1500, 2000, 2500, 3000 eV.

| Index | $J_b$ | 200      | 300      | 400      | 500      | 700      | 1000     | 1200     | 1500     | 2000     | 2500     | 3000     |
|-------|-------|----------|----------|----------|----------|----------|----------|----------|----------|----------|----------|----------|
| 43    | 1     | 1.761E-2 | 1.499E-2 | 1.283E-2 | 1.120E-2 | 8.990E-3 | 7.020E-3 | 6.162E-3 | 5.243E-3 | 4.239E-3 | 3.584E-3 | 3.120E-3 |
| 41    | 1     | 4.624E-3 | 3.906E-3 | 3.333E-3 | 2.906E-3 | 2.332E-3 | 1.820E-3 | 1.598E-3 | 1.360E-3 | 1.099E-3 | 9.295E-4 | 8.095E-4 |
| 38    | 1     | 1.158E-4 | 6.587E-5 | 4.493E-5 | 3.276E-5 | 2.047E-5 | 1.335E-5 | 1.103E-5 | 8.848E-6 | 6.770E-6 | 5.557E-6 | 4.759E-6 |
| 35    | 1     | 1.138E-4 | 8.358E-5 | 6.995E-5 | 6.134E-5 | 5.055E-5 | 4.099E-5 | 3.664E-5 | 3.184E-5 | 2.639E-5 | 2.270E-5 | 2.001E-5 |
| 33    | 1     | 9.245E-4 | 8.872E-4 | 8.321E-4 | 7.782E-4 | 6.887E-4 | 5.850E-4 | 5.311E-4 | 4.687E-4 | 3.942E-4 | 3.419E-4 | 3.029E-4 |
| 31    | 1     | 8.566E-4 | 8.177E-4 | 7.651E-4 | 7.138E-4 | 6.294E-4 | 5.343E-4 | 4.849E-4 | 4.276E-4 | 3.597E-4 | 3.120E-4 | 2.765E-4 |
| 29    | 1     | 7.221E-2 | 6.252E-2 | 5.456E-2 | 4.851E-2 | 3.999E-2 | 3.207E-2 | 2.851E-2 | 2.457E-2 | 2.015E-2 | 1.723E-2 | 1.514E-2 |
| 26    | 1     | 3.220E-3 | 2.725E-3 | 2.358E-3 | 2.087E-3 | 1.715E-3 | 1.374E-3 | 1.221E-3 | 1.052E-3 | 8.628E-4 | 7.379E-4 | 6.487E-4 |
| 24    | 1     | 4.058E-4 | 2.586E-4 | 1.867E-4 | 1.454E-4 | 1.040E-4 | 7.709E-5 | 6.686E-5 | 5.651E-5 | 4.577E-5 | 3.896E-5 | 3.418E-5 |
| 21    | 1     | 2.174E-4 | 1.795E-4 | 1.609E-4 | 1.475E-4 | 1.274E-4 | 1.062E-4 | 9.597E-5 | 8.438E-5 | 7.061E-5 | 6.105E-5 | 5.403E-5 |
| 19    | 1     | 4.346E-3 | 4.003E-3 | 3.668E-3 | 3.389E-3 | 2.950E-3 | 2.467E-3 | 2.230E-3 | 1.960E-3 | 1.639E-3 | 1.417E-3 | 1.253E-3 |
| 17    | 1     | 2.822E-3 | 2.588E-3 | 2.370E-3 | 2.191E-3 | 1.908E-3 | 1.594E-3 | 1.441E-3 | 1.267E-3 | 1.059E-3 | 9.151E-4 | 8.094E-4 |
| 15    | 1     | 2.476E-1 | 2.175E-1 | 1.941E-1 | 1.757E-1 | 1.489E-1 | 1.226E-1 | 1.103E-1 | 9.630E-2 | 8.020E-2 | 6.931E-2 | 6.140E-2 |
| 13    | 1     | 1.284E-3 | 8.720E-4 | 6.823E-4 | 5.757E-4 | 4.550E-4 | 3.592E-4 | 3.187E-4 | 2.746E-4 | 2.254E-4 | 1.931E-4 | 1.700E-4 |
| 10    | 1     | 2.143E-3 | 1.017E-3 | 5.680E-4 | 3.589E-4 | 1.850E-4 | 1.012E-4 | 7.808E-5 | 5.929E-5 | 4.394E-5 | 3.588E-5 | 3.093E-5 |
| 7     | 1     | 7.411E-3 | 6.384E-3 | 5.709E-3 | 5.179E-3 | 4.390E-3 | 3.625E-3 | 3.261E-3 | 2.841E-3 | 2.359E-3 | 2.037E-3 | 1.804E-3 |
| 5     | 1     | 3.452E-2 | 2.959E-2 | 2.635E-2 | 2.384E-2 | 2.013E-2 | 1.656E-2 | 1.487E-2 | 1.294E-2 | 1.072E-2 | 9.243E-3 | 8.179E-3 |
| 3     | 1     | 2.096E-4 | 8.829E-5 | 4.899E-5 | 2.959E-5 | 1.288E-5 | 5.189E-6 | 3.562E-6 | 2.553E-6 | 1.809E-6 | 1.426E-6 | 1.201E-6 |

**Table S3.** Cross sections ( $10^{-20} \text{ m}^2$ ) for  $\text{Xe}^{9+}$  at incident electron energies 200, 300, 400, 500, 700, 1000, 1200, 1500, 2000, 2500, 3000 eV.  $a$  and  $b$  refer to the indices of the initial and final levels, respectively.

| $a$ | $J_a$ | $b$ | $J_b$ | 200      | 300      | 400      | 500      | 700      | 1000     | 1200     | 1500     | 2000     | 2500     | 3000     |
|-----|-------|-----|-------|----------|----------|----------|----------|----------|----------|----------|----------|----------|----------|----------|
| 2   | 3/2   | 57  | 1/2   | 4.665E-2 | 3.913E-2 | 3.408E-2 | 3.039E-2 | 2.531E-2 | 2.056E-2 | 1.839E-2 | 1.598E-2 | 1.324E-2 | 1.140E-2 | 1.006E-2 |
| 1   | 5/2   | 56  | 5/2   | 1.594E-3 | 1.328E-3 | 1.156E-3 | 1.031E-3 | 8.602E-4 | 6.997E-4 | 6.261E-4 | 5.445E-4 | 4.516E-4 | 3.887E-4 | 3.430E-4 |
| 1   | 5/2   | 55  | 3/2   | 1.254E-2 | 1.048E-2 | 9.122E-3 | 8.128E-3 | 6.765E-3 | 5.488E-3 | 4.905E-3 | 4.260E-3 | 3.527E-3 | 3.033E-3 | 2.674E-3 |
| 2   | 3/2   | 56  | 5/2   | 1.562E-1 | 1.313E-1 | 1.147E-1 | 1.024E-1 | 8.541E-2 | 6.942E-2 | 6.209E-2 | 5.397E-2 | 4.473E-2 | 3.849E-2 | 3.394E-2 |
| 1   | 5/2   | 54  | 7/2   | 1.414E-1 | 1.189E-1 | 1.038E-1 | 9.272E-2 | 7.738E-2 | 6.291E-2 | 5.628E-2 | 4.892E-2 | 4.055E-2 | 3.489E-2 | 3.077E-2 |
| 1   | 5/2   | 53  | 5/2   | 9.937E-2 | 8.334E-2 | 7.264E-2 | 6.480E-2 | 5.400E-2 | 4.385E-2 | 3.921E-2 | 3.406E-2 | 2.822E-2 | 2.427E-2 | 2.139E-2 |
| 2   | 3/2   | 55  | 3/2   | 8.251E-2 | 6.920E-2 | 6.032E-2 | 5.381E-2 | 4.485E-2 | 3.641E-2 | 3.256E-2 | 2.829E-2 | 2.343E-2 | 2.015E-2 | 1.776E-2 |
| 1   | 5/2   | 51  | 3/2   | 5.690E-4 | 4.282E-4 | 3.481E-4 | 2.961E-4 | 2.296E-4 | 1.725E-4 | 1.489E-4 | 1.243E-4 | 9.788E-5 | 8.118E-5 | 6.962E-5 |
| 1   | 5/2   | 50  | 3/2   | 2.405E-4 | 1.835E-4 | 1.527E-4 | 1.325E-4 | 1.061E-4 | 8.300E-5 | 7.305E-5 | 6.228E-5 | 5.042E-5 | 4.269E-5 | 3.721E-5 |
| 2   | 3/2   | 52  | 1/2   | 1.694E-3 | 1.435E-3 | 1.258E-3 | 1.134E-3 | 9.531E-4 | 7.779E-4 | 6.989E-4 | 6.101E-4 | 5.060E-4 | 4.351E-4 | 3.836E-4 |
| 2   | 3/2   | 50  | 3/2   | 6.190E-4 | 4.575E-4 | 3.761E-4 | 3.245E-4 | 2.594E-4 | 2.039E-4 | 1.800E-4 | 1.540E-4 | 1.253E-4 | 1.064E-4 | 9.295E-5 |
| 1   | 5/2   | 46  | 5/2   | 2.782E-4 | 1.521E-4 | 1.021E-4 | 7.767E-5 | 5.477E-5 | 4.034E-5 | 3.503E-5 | 2.967E-5 | 2.407E-5 | 2.046E-5 | 1.790E-5 |
| 2   | 3/2   | 49  | 1/2   | 4.944E-4 | 3.660E-4 | 2.988E-4 | 2.602E-4 | 2.106E-4 | 1.684E-4 | 1.510E-4 | 1.317E-4 | 1.088E-4 | 9.343E-5 | 8.243E-5 |
| 1   | 5/2   | 45  | 5/2   | 2.349E-4 | 1.258E-4 | 8.206E-5 | 6.069E-5 | 4.093E-5 | 2.900E-5 | 2.483E-5 | 2.075E-5 | 1.662E-5 | 1.403E-5 | 1.223E-5 |
| 2   | 3/2   | 48  | 1/2   | 2.951E-4 | 2.108E-4 | 1.717E-4 | 1.498E-4 | 1.223E-4 | 9.928E-5 | 8.939E-5 | 7.814E-5 | 6.483E-5 | 5.590E-5 | 4.949E-5 |
| 1   | 5/2   | 43  | 7/2   | 9.381E-5 | 5.719E-5 | 4.234E-5 | 3.448E-5 | 2.624E-5 | 2.043E-5 | 1.808E-5 | 1.556E-5 | 1.282E-5 | 1.102E-5 | 9.729E-6 |
| 2   | 3/2   | 47  | 1/2   | 2.155E-4 | 1.737E-4 | 1.518E-4 | 1.370E-4 | 1.155E-4 | 9.539E-5 | 8.611E-5 | 7.540E-5 | 6.285E-5 | 5.432E-5 | 4.811E-5 |
| 1   | 5/2   | 41  | 7/2   | 6.386E-4 | 5.376E-4 | 4.784E-4 | 4.343E-4 | 3.688E-4 | 3.057E-4 | 2.758E-4 | 2.412E-4 | 2.011E-4 | 1.738E-4 | 1.538E-4 |
| 1   | 5/2   | 39  | 5/2   | 8.957E-5 | 6.936E-5 | 5.936E-5 | 5.258E-5 | 4.354E-5 | 3.565E-5 | 3.207E-5 | 2.799E-5 | 2.332E-5 | 2.015E-5 | 1.784E-5 |
| 1   | 5/2   | 36  | 3/2   | 2.599E-4 | 1.359E-4 | 8.566E-5 | 6.108E-5 | 3.876E-5 | 2.582E-5 | 2.148E-5 | 1.740E-5 | 1.349E-5 | 1.115E-5 | 9.570E-6 |
| 2   | 3/2   | 45  | 5/2   | 6.314E-4 | 3.787E-4 | 2.710E-4 | 2.150E-4 | 1.581E-4 | 1.188E-4 | 1.037E-4 | 8.808E-5 | 7.146E-5 | 6.069E-5 | 5.308E-5 |
| 2   | 3/2   | 44  | 5/2   | 8.735E-4 | 4.581E-4 | 2.877E-4 | 2.044E-4 | 1.290E-4 | 8.612E-5 | 7.208E-5 | 5.900E-5 | 4.644E-5 | 3.888E-5 | 3.376E-5 |
| 1   | 5/2   | 34  | 5/2   | 2.099E-4 | 1.540E-4 | 1.257E-4 | 1.071E-4 | 8.386E-5 | 6.469E-5 | 5.659E-5 | 4.791E-5 | 3.851E-5 | 3.241E-5 | 2.809E-5 |
| 1   | 5/2   | 33  | 5/2   | 4.547E-4 | 3.745E-4 | 3.301E-4 | 2.980E-4 | 2.516E-4 | 2.080E-4 | 1.876E-4 | 1.640E-4 | 1.367E-4 | 1.181E-4 | 1.045E-4 |
| 1   | 5/2   | 32  | 3/2   | 2.452E-4 | 1.390E-4 | 9.559E-5 | 7.382E-5 | 5.272E-5 | 3.908E-5 | 3.400E-5 | 2.883E-5 | 2.340E-5 | 1.992E-5 | 1.746E-5 |
| 2   | 3/2   | 42  | 1/2   | 3.671E-3 | 3.171E-3 | 2.844E-3 | 2.592E-3 | 2.208E-3 | 1.833E-3 | 1.654E-3 | 1.447E-3 | 1.206E-3 | 1.042E-3 | 9.223E-4 |
| 1   | 5/2   | 31  | 3/2   | 1.935E-3 | 1.660E-3 | 1.482E-3 | 1.346E-3 | 1.141E-3 | 9.427E-4 | 8.493E-4 | 7.414E-4 | 6.166E-4 | 5.318E-4 | 4.701E-4 |
| 1   | 5/2   | 30  | 7/2   | 8.013E-4 | 4.439E-4 | 2.958E-4 | 2.220E-4 | 1.526E-4 | 1.106E-4 | 9.574E-5 | 8.093E-5 | 6.575E-5 | 5.613E-5 | 4.939E-5 |
| 2   | 3/2   | 40  | 1/2   | 2.630E-4 | 1.649E-4 | 1.217E-4 | 9.862E-5 | 7.451E-5 | 5.777E-5 | 5.113E-5 | 4.401E-5 | 3.622E-5 | 3.112E-5 | 2.748E-5 |
| 2   | 3/2   | 39  | 5/2   | 5.631E-3 | 4.835E-3 | 4.322E-3 | 3.927E-3 | 3.332E-3 | 2.757E-3 | 2.484E-3 | 2.169E-3 | 1.805E-3 | 1.558E-3 | 1.377E-3 |
| 2   | 3/2   | 38  | 5/2   | 3.761E-4 | 2.124E-4 | 1.439E-4 | 1.092E-4 | 7.588E-5 | 5.505E-5 | 4.755E-5 | 4.007E-5 | 3.236E-5 | 2.746E-5 | 2.404E-5 |
| 1   | 5/2   | 28  | 7/2   | 5.357E-4 | 3.679E-4 | 2.939E-4 | 2.516E-4 | 2.021E-4 | 1.626E-4 | 1.455E-4 | 1.264E-4 | 1.048E-4 | 9.038E-5 | 7.992E-5 |
| 1   | 5/2   | 27  | 3/2   | 4.827E-4 | 4.140E-4 | 3.709E-4 | 3.377E-4 | 2.875E-4 | 2.387E-4 | 2.154E-4 | 1.884E-4 | 1.571E-4 | 1.358E-4 | 1.202E-4 |
| 1   | 5/2   | 26  | 5/2   | 1.034E-4 | 7.095E-5 | 5.507E-5 | 4.499E-5 | 3.312E-5 | 2.403E-5 | 2.044E-5 | 1.679E-5 | 1.301E-5 | 1.065E-5 | 9.023E-6 |
| 1   | 5/2   | 25  | 3/2   | 5.293E-4 | 3.315E-4 | 2.473E-4 | 2.023E-4 | 1.545E-4 | 1.204E-4 | 1.067E-4 | 9.184E-5 | 7.558E-5 | 6.491E-5 | 5.728E-5 |
| 2   | 3/2   | 37  | 5/2   | 6.399E-4 | 2.949E-4 | 1.587E-4 | 9.510E-5 | 4.281E-5 | 1.871E-5 | 1.253E-5 | 7.888E-6 | 4.690E-6 | 3.294E-6 | 2.575E-6 |

Table S3 continued

| $a$ | $J_a$ | $b$ | $J_b$ | 200      | 300      | 400      | 500      | 700      | 1000     | 1200     | 1500     | 2000     | 2500     | 3000     |
|-----|-------|-----|-------|----------|----------|----------|----------|----------|----------|----------|----------|----------|----------|----------|
| 2   | 3/2   | 35  | 1/2   | 4.263E-4 | 3.460E-4 | 3.020E-4 | 2.715E-4 | 2.285E-4 | 1.884E-4 | 1.697E-4 | 1.482E-4 | 1.234E-4 | 1.066E-4 | 9.429E-5 |
| 1   | 5/2   | 23  | 5/2   | 8.927E-4 | 5.566E-4 | 4.110E-4 | 3.335E-4 | 2.524E-4 | 1.958E-4 | 1.731E-4 | 1.489E-4 | 1.226E-4 | 1.053E-4 | 9.294E-5 |
| 1   | 5/2   | 21  | 3/2   | 3.852E-3 | 3.313E-3 | 2.966E-3 | 2.700E-3 | 2.295E-3 | 1.902E-3 | 1.715E-3 | 1.499E-3 | 1.248E-3 | 1.077E-3 | 9.531E-4 |
| 2   | 3/2   | 34  | 5/2   | 1.743E-3 | 1.481E-3 | 1.319E-3 | 1.195E-3 | 1.012E-3 | 8.360E-4 | 7.529E-4 | 6.570E-4 | 5.464E-4 | 4.713E-4 | 4.166E-4 |
| 1   | 5/2   | 20  | 7/2   | 1.099E-3 | 5.808E-4 | 3.718E-4 | 2.697E-4 | 1.766E-4 | 1.229E-4 | 1.048E-4 | 8.747E-5 | 7.027E-5 | 5.962E-5 | 5.227E-5 |
| 1   | 5/2   | 19  | 5/2   | 3.517E-3 | 2.986E-3 | 2.660E-3 | 2.415E-3 | 2.048E-3 | 1.696E-3 | 1.529E-3 | 1.336E-3 | 1.112E-3 | 9.602E-4 | 8.494E-4 |
| 1   | 5/2   | 18  | 3/2   | 4.561E-5 | 3.092E-5 | 2.422E-5 | 2.007E-5 | 1.516E-5 | 1.134E-5 | 9.793E-6 | 8.178E-6 | 6.463E-6 | 5.377E-6 | 4.624E-6 |
| 2   | 3/2   | 33  | 5/2   | 2.932E-3 | 2.480E-3 | 2.205E-3 | 1.997E-3 | 1.689E-3 | 1.395E-3 | 1.256E-3 | 1.097E-3 | 9.120E-4 | 7.868E-4 | 6.955E-4 |
| 2   | 3/2   | 32  | 3/2   | 4.486E-4 | 2.195E-4 | 1.274E-4 | 8.338E-5 | 4.545E-5 | 2.628E-5 | 2.074E-5 | 1.603E-5 | 1.204E-5 | 9.864E-6 | 8.483E-6 |
| 2   | 3/2   | 31  | 3/2   | 2.773E-3 | 2.366E-3 | 2.109E-3 | 1.915E-3 | 1.623E-3 | 1.342E-3 | 1.209E-3 | 1.056E-3 | 8.783E-4 | 7.579E-4 | 6.702E-4 |
| 1   | 5/2   | 16  | 5/2   | 2.246E-3 | 1.910E-3 | 1.704E-3 | 1.547E-3 | 1.312E-3 | 1.086E-3 | 9.786E-4 | 8.547E-4 | 7.114E-4 | 6.141E-4 | 5.431E-4 |
| 1   | 5/2   | 15  | 7/2   | 2.168E-3 | 1.799E-3 | 1.577E-3 | 1.414E-3 | 1.180E-3 | 9.623E-4 | 8.620E-4 | 7.481E-4 | 6.179E-4 | 5.304E-4 | 4.672E-4 |
| 1   | 5/2   | 14  | 5/2   | 9.389E-4 | 7.786E-4 | 6.840E-4 | 6.141E-4 | 5.141E-4 | 4.209E-4 | 3.777E-4 | 3.283E-4 | 2.720E-4 | 2.340E-4 | 2.063E-4 |
| 2   | 3/2   | 29  | 1/2   | 1.771E-4 | 1.394E-4 | 1.181E-4 | 1.047E-4 | 8.566E-5 | 6.910E-5 | 6.205E-5 | 5.404E-5 | 4.452E-5 | 3.821E-5 | 3.373E-5 |
| 2   | 3/2   | 27  | 3/2   | 6.672E-3 | 5.728E-3 | 5.122E-3 | 4.656E-3 | 3.952E-3 | 3.271E-3 | 2.948E-3 | 2.574E-3 | 2.142E-3 | 1.848E-3 | 1.634E-3 |
| 2   | 3/2   | 26  | 5/2   | 1.484E-3 | 1.248E-3 | 1.107E-3 | 1.002E-3 | 8.469E-4 | 6.990E-4 | 6.295E-4 | 5.493E-4 | 4.568E-4 | 3.941E-4 | 3.484E-4 |
| 2   | 3/2   | 25  | 3/2   | 3.444E-4 | 2.028E-4 | 1.418E-4 | 1.103E-4 | 7.915E-5 | 5.905E-5 | 5.154E-5 | 4.383E-5 | 3.575E-5 | 3.056E-5 | 2.689E-5 |
| 2   | 3/2   | 24  | 1/2   | 3.282E-4 | 2.634E-4 | 2.289E-4 | 2.053E-4 | 1.723E-4 | 1.419E-4 | 1.277E-4 | 1.115E-4 | 9.293E-5 | 8.025E-5 | 7.098E-5 |
| 1   | 5/2   | 13  | 5/2   | 3.653E-3 | 3.124E-3 | 2.791E-3 | 2.534E-3 | 2.150E-3 | 1.780E-3 | 1.604E-3 | 1.400E-3 | 1.165E-3 | 1.006E-3 | 8.894E-4 |
| 1   | 5/2   | 12  | 3/2   | 1.578E-4 | 1.140E-4 | 9.429E-5 | 8.195E-5 | 6.623E-5 | 5.327E-5 | 4.769E-5 | 4.142E-5 | 3.424E-5 | 2.945E-5 | 2.601E-5 |
| 2   | 3/2   | 23  | 5/2   | 3.404E-4 | 2.268E-4 | 1.756E-4 | 1.468E-4 | 1.144E-4 | 8.993E-5 | 7.979E-5 | 6.878E-5 | 5.662E-5 | 4.860E-5 | 4.284E-5 |
| 2   | 3/2   | 22  | 1/2   | 2.103E-4 | 1.742E-4 | 1.531E-4 | 1.379E-4 | 1.159E-4 | 9.515E-5 | 8.554E-5 | 7.454E-5 | 6.186E-5 | 5.328E-5 | 4.705E-5 |
| 2   | 3/2   | 21  | 3/2   | 9.376E-4 | 7.776E-4 | 6.834E-4 | 6.142E-4 | 5.147E-4 | 4.218E-4 | 3.784E-4 | 3.290E-4 | 2.726E-4 | 2.345E-4 | 2.068E-4 |
| 1   | 5/2   | 11  | 7/2   | 1.650E-3 | 1.372E-3 | 1.206E-3 | 1.084E-3 | 9.081E-4 | 7.441E-4 | 6.679E-4 | 5.809E-4 | 4.814E-4 | 4.143E-4 | 3.655E-4 |
| 2   | 3/2   | 19  | 5/2   | 8.183E-4 | 6.568E-4 | 5.700E-4 | 5.094E-4 | 4.245E-4 | 3.467E-4 | 3.110E-4 | 2.703E-4 | 2.237E-4 | 1.924E-4 | 1.697E-4 |
| 1   | 5/2   | 10  | 5/2   | 2.124E-3 | 1.791E-3 | 1.587E-3 | 1.434E-3 | 1.209E-3 | 9.952E-4 | 8.951E-4 | 7.800E-4 | 6.474E-4 | 5.578E-4 | 4.926E-4 |
| 2   | 3/2   | 16  | 5/2   | 9.264E-4 | 7.784E-4 | 6.874E-4 | 6.196E-4 | 5.207E-4 | 4.272E-4 | 3.836E-4 | 3.337E-4 | 2.766E-4 | 2.380E-4 | 2.100E-4 |
| 1   | 5/2   | 8   | 3/2   | 6.909E-5 | 4.235E-5 | 3.234E-5 | 2.678E-5 | 2.047E-5 | 1.590E-5 | 1.405E-5 | 1.203E-5 | 9.824E-6 | 8.400E-6 | 7.397E-6 |
| 2   | 3/2   | 13  | 5/2   | 4.421E-4 | 3.708E-4 | 3.281E-4 | 2.963E-4 | 2.497E-4 | 2.056E-4 | 1.849E-4 | 1.611E-4 | 1.338E-4 | 1.153E-4 | 1.019E-4 |
| 1   | 5/2   | 7   | 7/2   | 1.012E-4 | 5.654E-5 | 4.101E-5 | 3.283E-5 | 2.417E-5 | 1.812E-5 | 1.584E-5 | 1.349E-5 | 1.095E-5 | 9.316E-6 | 8.165E-6 |
| 1   | 5/2   | 6   | 5/2   | 4.744E-4 | 3.712E-4 | 3.166E-4 | 2.790E-4 | 2.283E-4 | 1.832E-4 | 1.631E-4 | 1.406E-4 | 1.154E-4 | 9.859E-5 | 8.653E-5 |
| 2   | 3/2   | 12  | 3/2   | 5.705E-4 | 4.615E-4 | 3.994E-4 | 3.553E-4 | 2.939E-4 | 2.379E-4 | 2.124E-4 | 1.838E-4 | 1.513E-4 | 1.297E-4 | 1.140E-4 |
| 1   | 5/2   | 5   | 3/2   | 1.921E-4 | 1.237E-4 | 9.426E-5 | 7.659E-5 | 5.653E-5 | 4.170E-5 | 3.589E-5 | 2.989E-5 | 2.359E-5 | 1.960E-5 | 1.683E-5 |
| 2   | 3/2   | 9   | 1/2   | 2.329E-5 | 1.150E-5 | 7.227E-6 | 4.992E-6 | 2.875E-6 | 1.762E-6 | 1.452E-6 | 1.186E-6 | 9.334E-7 | 7.844E-7 | 6.855E-7 |
| 2   | 3/2   | 8   | 3/2   | 9.619E-5 | 4.932E-5 | 3.173E-5 | 2.234E-5 | 1.340E-5 | 8.535E-6 | 7.100E-6 | 5.827E-6 | 4.603E-6 | 3.857E-6 | 3.349E-6 |
| 1   | 5/2   | 4   | 3/2   | 1.452E-3 | 8.928E-4 | 6.281E-4 | 4.867E-4 | 3.335E-4 | 2.354E-4 | 2.002E-4 | 1.643E-4 | 1.281E-4 | 1.067E-4 | 9.251E-5 |
| 1   | 5/2   | 3   | 7/2   | 2.019E-4 | 1.090E-4 | 7.443E-5 | 5.545E-5 | 3.636E-5 | 2.467E-5 | 2.075E-5 | 1.702E-5 | 1.332E-5 | 1.104E-5 | 9.480E-6 |
| 2   | 3/2   | 5   | 3/2   | 2.899E-4 | 2.400E-4 | 2.100E-4 | 1.882E-4 | 1.572E-4 | 1.284E-4 | 1.151E-4 | 9.994E-5 | 8.268E-5 | 7.106E-5 | 6.264E-5 |
| 2   | 3/2   | 4   | 3/2   | 9.984E-4 | 5.582E-4 | 3.571E-4 | 2.525E-4 | 1.520E-4 | 9.489E-5 | 7.634E-5 | 5.922E-5 | 4.387E-5 | 3.531E-5 | 2.983E-5 |

**Table S4.** Cross sections ( $10^{-20} \text{ m}^2$ ) for  $\text{Xe}^{10+}$  at incident electron energies 200, 300, 400, 500, 700, 1000, 1200, 1500, 2000, 2500, 3000 eV.  $a$  and  $b$  refer to the indices of the initial and final levels, respectively.

| $a$ | $J_a$ | $b$ | $J_b$ | 200      | 300      | 400      | 500      | 700      | 1000     | 1200     | 1500     | 2000     | 2500     | 3000     |
|-----|-------|-----|-------|----------|----------|----------|----------|----------|----------|----------|----------|----------|----------|----------|
| 3   | 3     | 57  | 3     | 4.131E-3 | 3.379E-3 | 2.910E-3 | 2.580E-3 | 2.134E-3 | 1.728E-3 | 1.544E-3 | 1.339E-3 | 1.109E-3 | 9.541E-4 | 8.416E-4 |
| 6   | 1     | 56  | 2     | 7.345E-2 | 6.009E-2 | 5.176E-2 | 4.586E-2 | 3.790E-2 | 3.064E-2 | 2.735E-2 | 2.371E-2 | 1.961E-2 | 1.684E-2 | 1.483E-2 |
| 7   | 4     | 57  | 3     | 7.242E-2 | 5.876E-2 | 5.035E-2 | 4.446E-2 | 3.658E-2 | 2.945E-2 | 2.626E-2 | 2.272E-2 | 1.875E-2 | 1.609E-2 | 1.415E-2 |
| 8   | 2     | 57  | 3     | 9.442E-3 | 7.737E-3 | 6.672E-3 | 5.917E-3 | 4.896E-3 | 3.962E-3 | 3.538E-3 | 3.069E-3 | 2.540E-3 | 2.182E-3 | 1.921E-3 |
| 8   | 2     | 56  | 2     | 2.199E-2 | 1.797E-2 | 1.548E-2 | 1.371E-2 | 1.133E-2 | 9.155E-3 | 8.172E-3 | 7.083E-3 | 5.858E-3 | 5.031E-3 | 4.430E-3 |
| 8   | 2     | 55  | 2     | 8.127E-2 | 6.630E-2 | 5.703E-2 | 5.046E-2 | 4.165E-2 | 3.361E-2 | 2.998E-2 | 2.597E-2 | 2.147E-2 | 1.843E-2 | 1.622E-2 |
| 2   | 2     | 48  | 3     | 1.197E-2 | 9.837E-3 | 8.499E-3 | 7.544E-3 | 6.252E-3 | 5.060E-3 | 4.520E-3 | 3.922E-3 | 3.246E-3 | 2.788E-3 | 2.455E-3 |
| 6   | 1     | 52  | 0     | 3.737E-2 | 3.044E-2 | 2.616E-2 | 2.314E-2 | 1.908E-2 | 1.539E-2 | 1.372E-2 | 1.188E-2 | 9.816E-3 | 8.423E-3 | 7.411E-3 |
| 7   | 4     | 54  | 5     | 1.377E-1 | 1.131E-1 | 9.766E-2 | 8.664E-2 | 7.175E-2 | 5.805E-2 | 5.184E-2 | 4.496E-2 | 3.720E-2 | 3.196E-2 | 2.813E-2 |
| 1   | 4     | 44  | 5     | 1.355E-1 | 1.112E-1 | 9.597E-2 | 8.513E-2 | 7.049E-2 | 5.701E-2 | 5.091E-2 | 4.415E-2 | 3.653E-2 | 3.137E-2 | 2.762E-2 |
| 3   | 3     | 47  | 2     | 3.529E-2 | 2.871E-2 | 2.465E-2 | 2.179E-2 | 1.796E-2 | 1.447E-2 | 1.290E-2 | 1.117E-2 | 9.221E-3 | 7.910E-3 | 6.959E-3 |
| 3   | 3     | 46  | 4     | 1.407E-1 | 1.154E-1 | 9.955E-2 | 8.828E-2 | 7.307E-2 | 5.909E-2 | 5.275E-2 | 4.575E-2 | 3.784E-2 | 3.250E-2 | 2.861E-2 |
| 2   | 2     | 45  | 3     | 8.970E-2 | 7.352E-2 | 6.342E-2 | 5.623E-2 | 4.652E-2 | 3.761E-2 | 3.357E-2 | 2.911E-2 | 2.408E-2 | 2.068E-2 | 1.820E-2 |
| 1   | 4     | 43  | 3     | 4.262E-2 | 3.464E-2 | 2.972E-2 | 2.626E-2 | 2.163E-2 | 1.743E-2 | 1.553E-2 | 1.345E-2 | 1.110E-2 | 9.521E-3 | 8.375E-3 |
| 7   | 4     | 53  | 3     | 7.248E-5 | 5.423E-5 | 4.500E-5 | 3.926E-5 | 3.207E-5 | 2.572E-5 | 2.293E-5 | 1.988E-5 | 1.639E-5 | 1.411E-5 | 1.250E-5 |
| 3   | 3     | 45  | 3     | 1.615E-2 | 1.317E-2 | 1.133E-2 | 1.002E-2 | 8.271E-3 | 6.673E-3 | 5.952E-3 | 5.155E-3 | 4.260E-3 | 3.656E-3 | 3.217E-3 |
| 1   | 4     | 42  | 4     | 1.067E-1 | 8.707E-2 | 7.491E-2 | 6.631E-2 | 5.474E-2 | 4.418E-2 | 3.941E-2 | 3.414E-2 | 2.821E-2 | 2.421E-2 | 2.130E-2 |
| 8   | 2     | 53  | 3     | 7.952E-2 | 6.516E-2 | 5.619E-2 | 4.981E-2 | 4.121E-2 | 3.330E-2 | 2.973E-2 | 2.577E-2 | 2.131E-2 | 1.830E-2 | 1.611E-2 |
| 6   | 1     | 50  | 2     | 3.072E-2 | 2.510E-2 | 2.161E-2 | 1.913E-2 | 1.580E-2 | 1.275E-2 | 1.138E-2 | 9.858E-3 | 8.147E-3 | 6.992E-3 | 6.152E-3 |
| 7   | 4     | 51  | 4     | 1.014E-1 | 8.291E-2 | 7.142E-2 | 6.326E-2 | 5.228E-2 | 4.221E-2 | 3.766E-2 | 3.264E-2 | 2.698E-2 | 2.315E-2 | 2.038E-2 |
| 6   | 1     | 49  | 1     | 4.318E-2 | 3.538E-2 | 3.050E-2 | 2.704E-2 | 2.237E-2 | 1.807E-2 | 1.613E-2 | 1.398E-2 | 1.156E-2 | 9.926E-3 | 8.737E-3 |
| 6   | 1     | 47  | 2     | 5.914E-2 | 4.850E-2 | 4.184E-2 | 3.710E-2 | 3.071E-2 | 2.482E-2 | 2.216E-2 | 1.921E-2 | 1.589E-2 | 1.364E-2 | 1.201E-2 |
| 7   | 4     | 40  | 3     | 4.203E-3 | 3.612E-3 | 3.230E-3 | 2.945E-3 | 2.510E-3 | 2.081E-3 | 1.881E-3 | 1.650E-3 | 1.376E-3 | 1.190E-3 | 1.054E-3 |
| 8   | 2     | 40  | 3     | 1.443E-3 | 1.246E-3 | 1.119E-3 | 1.023E-3 | 8.755E-4 | 7.287E-4 | 6.596E-4 | 5.794E-4 | 4.841E-4 | 4.191E-4 | 3.717E-4 |
| 7   | 4     | 39  | 3     | 2.106E-3 | 1.792E-3 | 1.592E-3 | 1.445E-3 | 1.226E-3 | 1.011E-3 | 9.115E-4 | 7.975E-4 | 6.636E-4 | 5.727E-4 | 5.068E-4 |
| 4   | 2     | 34  | 3     | 2.663E-3 | 2.299E-3 | 2.066E-3 | 1.890E-3 | 1.617E-3 | 1.345E-3 | 1.218E-3 | 1.069E-3 | 8.927E-4 | 7.726E-4 | 6.853E-4 |
| 6   | 1     | 36  | 2     | 2.893E-3 | 2.455E-3 | 2.182E-3 | 1.981E-3 | 1.682E-3 | 1.390E-3 | 1.255E-3 | 1.099E-3 | 9.153E-4 | 7.907E-4 | 7.002E-4 |
| 8   | 2     | 38  | 1     | 1.010E-3 | 8.639E-4 | 7.740E-4 | 7.060E-4 | 6.021E-4 | 5.004E-4 | 4.525E-4 | 3.969E-4 | 3.311E-4 | 2.865E-4 | 2.540E-4 |
| 7   | 4     | 37  | 5     | 2.900E-3 | 2.463E-3 | 2.190E-3 | 1.985E-3 | 1.681E-3 | 1.387E-3 | 1.251E-3 | 1.094E-3 | 9.096E-4 | 7.850E-4 | 6.947E-4 |
| 4   | 2     | 30  | 2     | 3.546E-3 | 3.056E-3 | 2.741E-3 | 2.503E-3 | 2.138E-3 | 1.776E-3 | 1.607E-3 | 1.410E-3 | 1.177E-3 | 1.018E-3 | 9.024E-4 |
| 3   | 3     | 25  | 3     | 2.481E-4 | 2.016E-4 | 1.770E-4 | 1.592E-4 | 1.339E-4 | 1.106E-4 | 9.960E-5 | 8.690E-5 | 7.226E-5 | 6.245E-5 | 5.534E-5 |
| 1   | 4     | 17  | 3     | 2.772E-3 | 2.390E-3 | 2.145E-3 | 1.959E-3 | 1.674E-3 | 1.392E-3 | 1.259E-3 | 1.105E-3 | 9.222E-4 | 7.979E-4 | 7.076E-4 |
| 9   | 0     | 41  | 1     | 1.413E-2 | 1.226E-2 | 1.105E-2 | 1.012E-2 | 8.672E-3 | 7.231E-3 | 6.548E-3 | 5.752E-3 | 4.808E-3 | 4.164E-3 | 3.695E-3 |
| 2   | 2     | 22  | 1     | 3.025E-3 | 2.604E-3 | 2.335E-3 | 2.131E-3 | 1.818E-3 | 1.510E-3 | 1.365E-3 | 1.197E-3 | 9.987E-4 | 8.638E-4 | 7.657E-4 |
| 8   | 2     | 35  | 1     | 1.541E-3 | 1.325E-3 | 1.190E-3 | 1.088E-3 | 9.302E-4 | 7.749E-4 | 7.015E-4 | 6.158E-4 | 5.144E-4 | 4.454E-4 | 3.952E-4 |
| 3   | 3     | 23  | 4     | 5.111E-3 | 4.410E-3 | 3.965E-3 | 3.625E-3 | 3.099E-3 | 2.579E-3 | 2.334E-3 | 2.048E-3 | 1.710E-3 | 1.480E-3 | 1.312E-3 |

Table S4 continued

| $a$ | $J_a$ | $b$ | $J_b$ | 200      | 300      | 400      | 500      | 700      | 1000     | 1200     | 1500     | 2000     | 2500     | 3000     |
|-----|-------|-----|-------|----------|----------|----------|----------|----------|----------|----------|----------|----------|----------|----------|
| 1   | 4     | 15  | 5     | 3.716E-3 | 3.178E-3 | 2.845E-3 | 2.595E-3 | 2.211E-3 | 1.836E-3 | 1.660E-3 | 1.455E-3 | 1.213E-3 | 1.049E-3 | 9.301E-4 |
| 4   | 2     | 28  | 3     | 2.453E-3 | 2.112E-3 | 1.896E-3 | 1.731E-3 | 1.478E-3 | 1.229E-3 | 1.111E-3 | 9.749E-4 | 8.136E-4 | 7.039E-4 | 6.242E-4 |
| 1   | 4     | 14  | 4     | 9.568E-4 | 8.182E-4 | 7.323E-4 | 6.675E-4 | 5.688E-4 | 4.724E-4 | 4.271E-4 | 3.745E-4 | 3.123E-4 | 2.701E-4 | 2.395E-4 |
| 4   | 2     | 27  | 1     | 2.236E-3 | 1.914E-3 | 1.711E-3 | 1.558E-3 | 1.325E-3 | 1.098E-3 | 9.912E-4 | 8.683E-4 | 7.234E-4 | 6.251E-4 | 5.537E-4 |
| 3   | 3     | 21  | 2     | 7.683E-4 | 6.479E-4 | 5.768E-4 | 5.247E-4 | 4.464E-4 | 3.704E-4 | 3.348E-4 | 2.935E-4 | 2.448E-4 | 2.118E-4 | 1.877E-4 |
| 8   | 2     | 34  | 3     | 1.555E-3 | 1.327E-3 | 1.186E-3 | 1.079E-3 | 9.177E-4 | 7.611E-4 | 6.875E-4 | 6.023E-4 | 5.021E-4 | 4.341E-4 | 3.847E-4 |
| 1   | 4     | 13  | 4     | 3.526E-3 | 3.008E-3 | 2.685E-3 | 2.442E-3 | 2.077E-3 | 1.721E-3 | 1.554E-3 | 1.362E-3 | 1.135E-3 | 9.811E-4 | 8.693E-4 |
| 3   | 3     | 20  | 2     | 1.012E-3 | 8.687E-4 | 7.791E-4 | 7.110E-4 | 6.069E-4 | 5.047E-4 | 4.565E-4 | 4.005E-4 | 3.343E-4 | 2.893E-4 | 2.565E-4 |
| 5   | 0     | 29  | 1     | 5.618E-3 | 4.833E-3 | 4.336E-3 | 3.959E-3 | 3.379E-3 | 2.809E-3 | 2.540E-3 | 2.228E-3 | 1.859E-3 | 1.608E-3 | 1.426E-3 |
| 3   | 3     | 19  | 3     | 2.082E-3 | 1.779E-3 | 1.590E-3 | 1.449E-3 | 1.234E-3 | 1.024E-3 | 9.253E-4 | 8.111E-4 | 6.764E-4 | 5.849E-4 | 5.184E-4 |
| 1   | 4     | 12  | 3     | 1.142E-3 | 9.577E-4 | 8.456E-4 | 7.632E-4 | 6.427E-4 | 5.284E-4 | 4.756E-4 | 4.153E-4 | 3.448E-4 | 2.973E-4 | 2.629E-4 |
| 7   | 4     | 32  | 4     | 5.375E-3 | 4.629E-3 | 4.157E-3 | 3.796E-3 | 3.241E-3 | 2.696E-3 | 2.439E-3 | 2.139E-3 | 1.785E-3 | 1.545E-3 | 1.370E-3 |
| 7   | 4     | 31  | 3     | 1.384E-3 | 1.176E-3 | 1.046E-3 | 9.502E-4 | 8.067E-4 | 6.670E-4 | 6.020E-4 | 5.272E-4 | 4.392E-4 | 3.794E-4 | 3.360E-4 |
| 2   | 2     | 18  | 1     | 1.084E-3 | 9.292E-4 | 8.324E-4 | 7.589E-4 | 6.467E-4 | 5.369E-4 | 4.853E-4 | 4.254E-4 | 3.547E-4 | 3.068E-4 | 2.719E-4 |
| 8   | 2     | 33  | 1     | 9.688E-4 | 8.230E-4 | 7.329E-4 | 6.661E-4 | 5.654E-4 | 4.678E-4 | 4.223E-4 | 3.698E-4 | 3.079E-4 | 2.659E-4 | 2.355E-4 |
| 4   | 2     | 24  | 1     | 1.323E-3 | 1.135E-3 | 1.017E-3 | 9.275E-4 | 7.906E-4 | 6.565E-4 | 5.934E-4 | 5.202E-4 | 4.338E-4 | 3.752E-4 | 3.326E-4 |
| 1   | 4     | 11  | 4     | 9.345E-4 | 7.872E-4 | 6.980E-4 | 6.326E-4 | 5.353E-4 | 4.420E-4 | 3.987E-4 | 3.489E-4 | 2.902E-4 | 2.506E-4 | 2.219E-4 |
| 8   | 2     | 31  | 3     | 2.803E-3 | 2.410E-3 | 2.164E-3 | 1.976E-3 | 1.687E-3 | 1.403E-3 | 1.269E-3 | 1.113E-3 | 9.292E-4 | 8.042E-4 | 7.132E-4 |
| 7   | 4     | 26  | 4     | 8.988E-4 | 7.544E-4 | 6.692E-4 | 6.063E-4 | 5.128E-4 | 4.238E-4 | 3.824E-4 | 3.345E-4 | 2.782E-4 | 2.403E-4 | 2.129E-4 |
| 1   | 4     | 10  | 3     | 5.357E-4 | 4.392E-4 | 3.852E-4 | 3.473E-4 | 2.928E-4 | 2.415E-4 | 2.179E-4 | 1.907E-4 | 1.588E-4 | 1.372E-4 | 1.216E-4 |
| 2   | 2     | 16  | 3     | 1.203E-3 | 1.020E-3 | 9.083E-4 | 8.255E-4 | 7.009E-4 | 5.806E-4 | 5.244E-4 | 4.594E-4 | 3.828E-4 | 3.309E-4 | 2.932E-4 |
